# Supplementary material for: Guanidine-functionalized Fe3O4 magnetic nanoparticles as basic recyclable catalysts for biodiesel production
Source: Royal Society of Chemistry journal article supplement (doi:10.1039/c5ra07331f), 2015-01-01
Supplement: c5ra07331f1.pdf [file c5ra07331f1.pdf]

## **Guanidine-functionalised Fe<sub>3</sub>O<sub>4</sub> magnetic nanoparticles as basic recyclable catalysts for biodiesel production**

Evelyn C. S. Santos,<sup>a</sup> Thiago C. dos Santos,<sup>a</sup> Renato B. Guimarães,<sup>b</sup> Lina Ishida,<sup>c</sup> Rafael S. Freitas,<sup>c</sup> Célia M. Ronconi\*<sup>a</sup>

[cmronconi@id.uff.br](mailto:cmronconi@id.uff.br)

**Supporting Information**

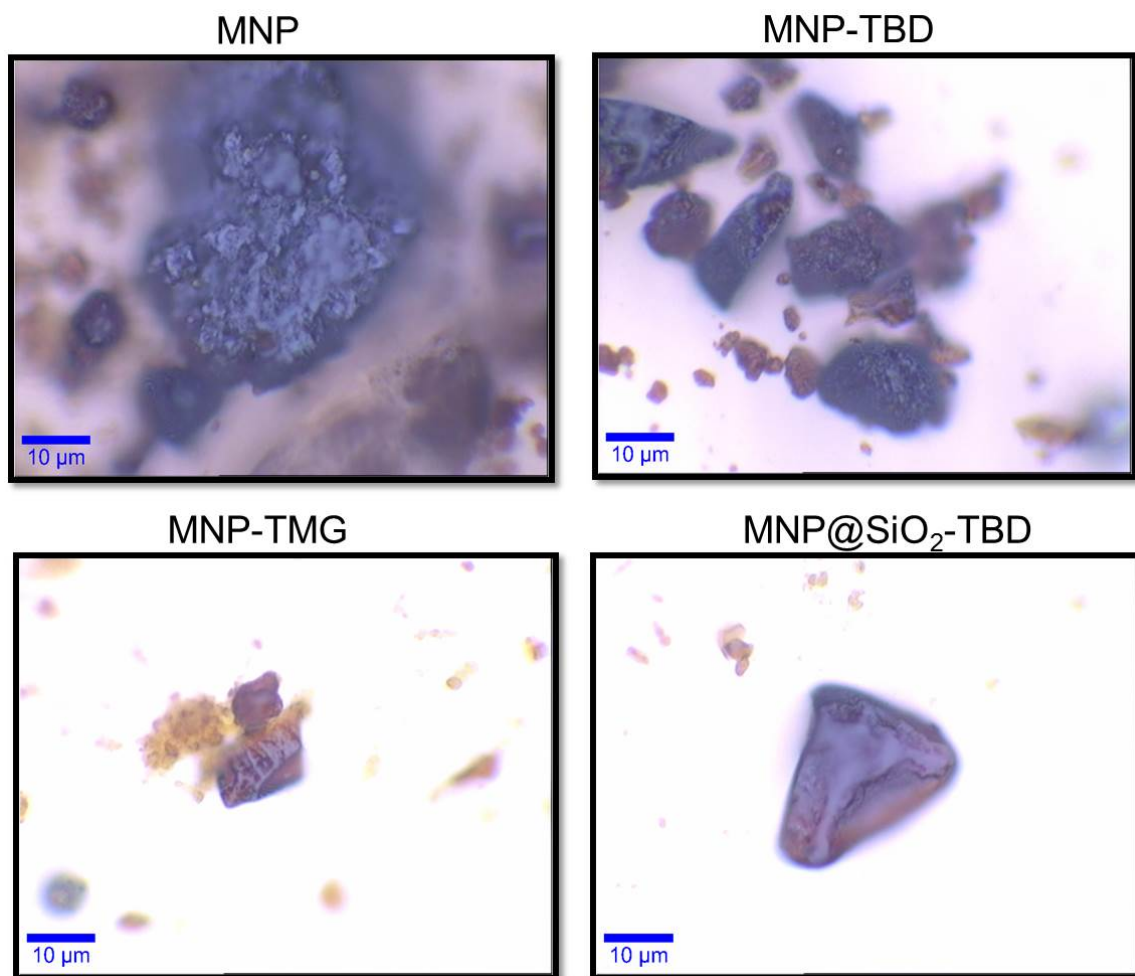

**Fig. S1:** Particles used in the acquisition of Raman spectra.

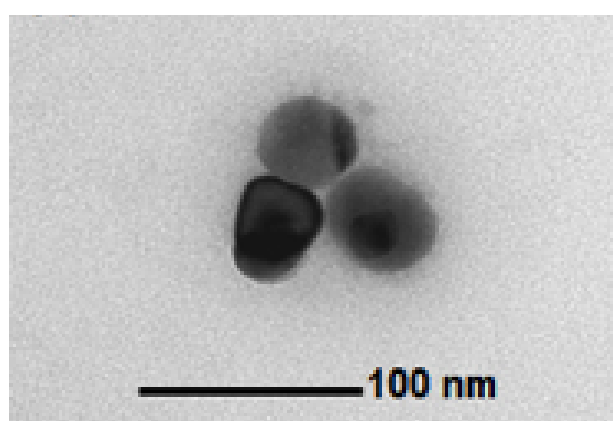

**Fig. S2:** TEM image of MNP@SiO<sub>2</sub>-TBD.

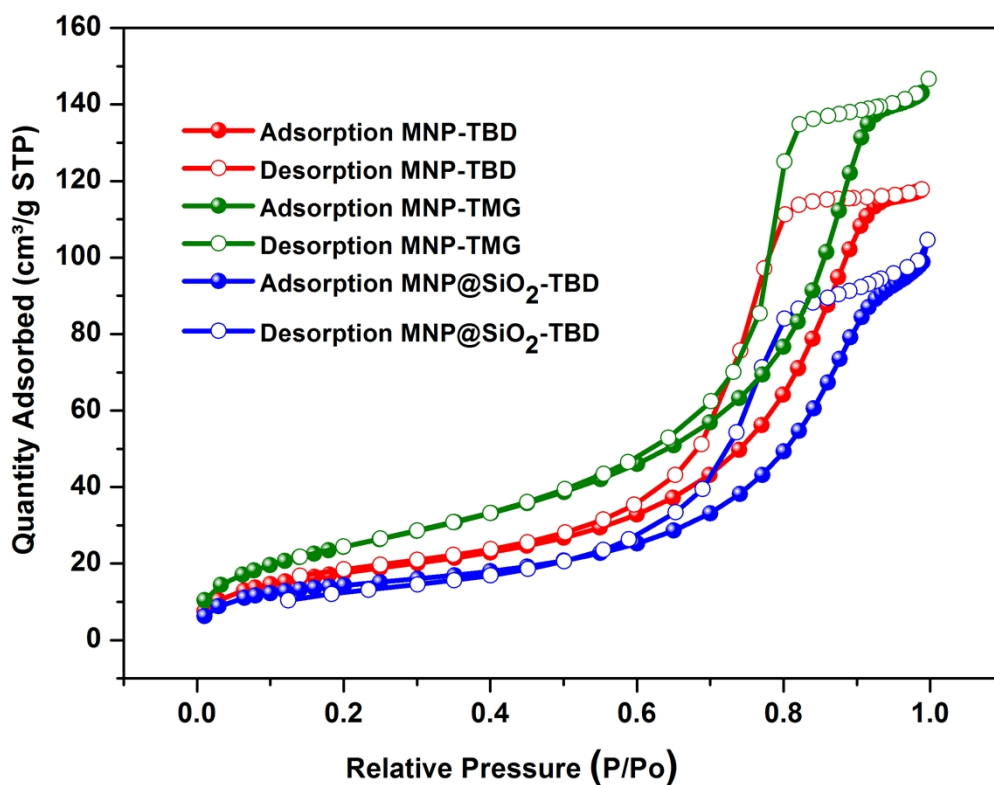

Fig. S3: N<sub>2</sub> adsorption/desorption isotherms of the nanocatalysts.

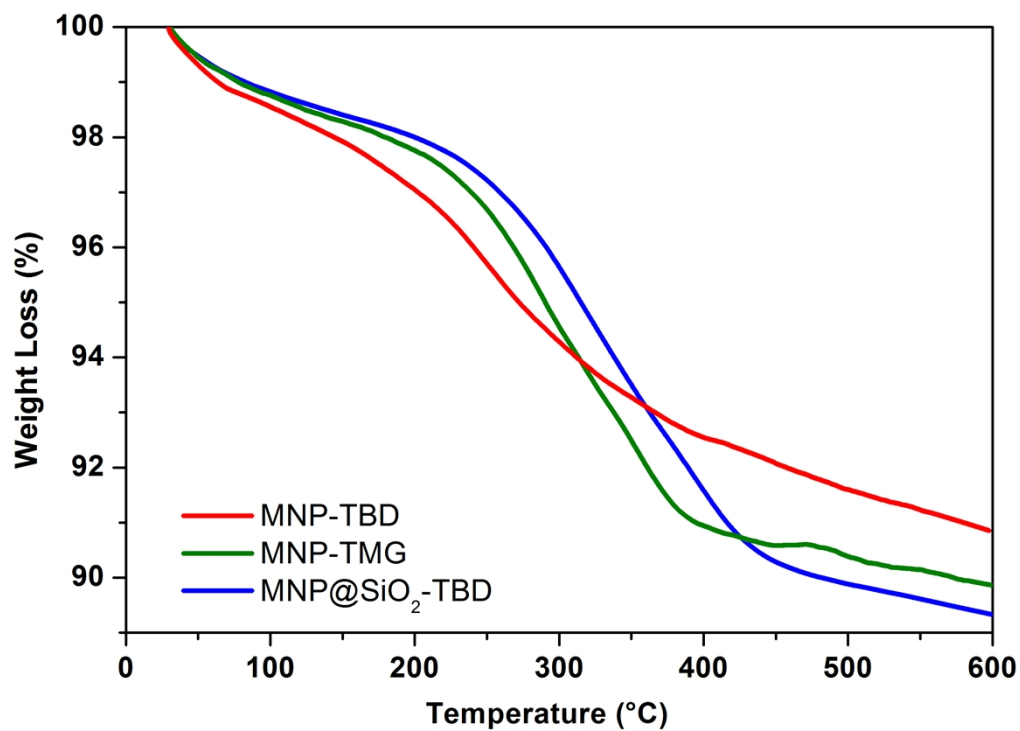

Fig. S4: TGA curves of the nanocatalysts.

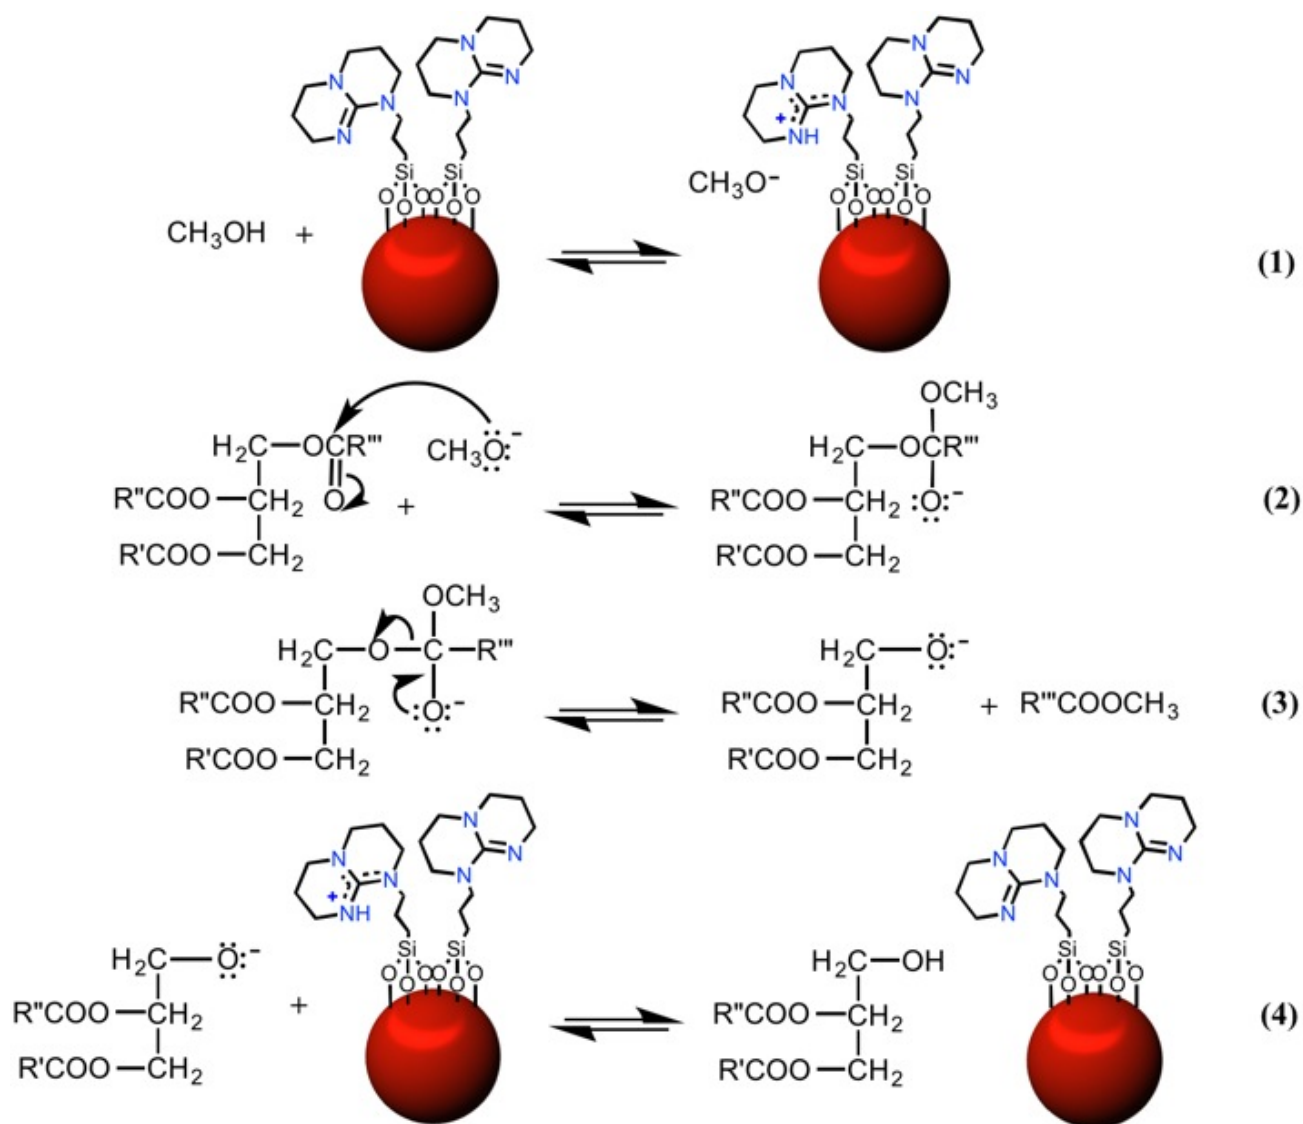

**Fig. S5:** Mechanistic scheme for transesterification reaction using MNP-TBD nanocatalyst.<sup>1</sup>

<sup>1</sup> U. Schuchardt, R. Sercheli, R. M. Vargas, *J. Braz. Chem. Soc.*, 1998, **9**, 199.
